# Supplementary material
Source: ML conference proceedings conference paper supplement (https://proceedings.mlr.press/v97/aydore19a.html)
Supplement: Supplementary file [file aydore19a-supp.pdf]

| Cognitive Task | Stimuli          | Description                                                                                                    |
|----------------|------------------|----------------------------------------------------------------------------------------------------------------|
| Working Memory | 2BK-0BK          | remembering two pictures back versus the current one                                                           |
|                | BODY-AVG         | presented body parts versus other visual objects                                                               |
|                | FACE-AVG         | presented faces versus other visual objects                                                                    |
|                | PLACE-AVG        | presented places versus other visual objects                                                                   |
| Gambling       | TOOL-AVG         | presented tools versus other visual objects                                                                    |
|                | PUNISH<br>REWARD | loss trials when asked to guess a range of a number.<br>reward trials when asked to guess a range of a number. |
| MOTOR          | LF-AVG           | Left foot movement versus other movements                                                                      |
|                | LH-AVG           | Left hand movements versus other movements                                                                     |
|                | RF-AVG           | Right foot movements versus other movements                                                                    |
|                | RH-AVG           | Right hand movements versus other movements                                                                    |
|                | T-AVG            | Tongue movements versus other movements                                                                        |
| Language       | MATH             | complete addition and subtraction problems                                                                     |
|                | STORY            | asked questions about topic of the story                                                                       |
| Relational     | MATCH            | decide if objects match                                                                                        |
|                | REL              | find differences between objects                                                                               |
| Emotion        | FACES            | decide which two faces match                                                                                   |
|                | SHAPES           | decide which two shapes match                                                                                  |
| Social         | RANDOM           | presented video clips where objects moved randomly                                                             |
|                | TOM              | presented video clips where objects interacted                                                                 |

Table A.1. Cognitive tasks and contrasts used for supervised classification for the neuroimaging data set

| Cognitive Task | Stimuli | Description                                            |
|----------------|---------|--------------------------------------------------------|
| Working Memory | 2BK-0BK | remembering two pictures back versus the current one   |
| Gambling       | PUNISH  | loss trials when asked to guess a range of a number.   |
|                | REWARD  | reward trials when asked to guess a range of a number. |
| Relational     | MATCH   | decide if objects match                                |
|                | REL     | find differences between objects                       |
| Emotion        | FACES   | decide which two faces match                           |
|                | SHAPES  | decide which two shapes match                          |
| Social         | TOM     | presented video clips where objects interacted         |

Table A.2. Cognitive tasks and contrasts used for supervised classification for the neuroimaging data set

| r : number of samples used for each $\Phi$ | b: number of projection matrices | Accuracy          |
|--------------------------------------------|----------------------------------|-------------------|
| 10                                         | 100                              | 79.88 $\pm$ 0.53  |
| 10                                         | 500                              | 78.28 $\pm$ 0.54  |
| 50                                         | 100                              | 79.24 $\pm$ 0.66  |
| 50                                         | 500                              | 78.05 $\pm$ 1.04  |
| 50                                         | 1500                             | 78.82 $\pm$ 0.79  |
| 100                                        | 100                              | 78.84 $\pm$ 0.82  |
| 100                                        | 500                              | 77.97 $\pm$ 0.823 |
| 100                                        | 1500                             | 78.50 $\pm$ 0.68  |
| 200                                        | 100                              | 78.30 $\pm$ 0.19  |
| 200                                        | 500                              | 78.46 $\pm$ 0.30  |
| 200                                        | 1500                             | 78.66 $\pm$ 0.60  |

Table A.3. Average and standard deviation of accuracy results of feature grouping for HCP dataset with sample size of 330 for different  $r$  and  $b$  values using logistic regression.

| Cluster % ( $100 * k/p$ ) | Test Accuracy (%) |                  |
|---------------------------|-------------------|------------------|
|                           | no noise          | high noise       |
| 0.01                      | 41.91 $\pm$ 1.10  | 43.24 $\pm$ 0.92 |
| 0.1                       | 74.50 $\pm$ 0.47  | 67.25 $\pm$ 0.54 |
| 1                         | 84.12 $\pm$ 0.47  | 76.00 $\pm$ 0.68 |
| 10                        | 87.37 $\pm$ 0.29  | 77.93 $\pm$ 0.38 |
| 20                        | 87.37 $\pm$ 0.23  | 78.05 $\pm$ 0.22 |
| 40                        | 87.57 $\pm$ 0.17  | 75.95 $\pm$ 0.49 |
| 80                        | 87.10 $\pm$ 0.19  | 72.28 $\pm$ 0.49 |

Table A.4. Average and standard deviation of accuracy results of feature grouping for HCP dataset with sample size of 330 for different  $k$  values using logistic regression.
